# Supplementary material for: Phase Transition of the Bacterium upon Invasion of a Host Cell as a Mechanism of Adaptation: a Mycoplasma gallisepticum Model
Source: PubMed Central journal article supplement (PMC5075909; doi:10.1038/srep35959), 2016-10-24
Supplement: srep35959-s1.pdf [file srep35959-s1.pdf]

## **Phase Transition of the Bacterium upon Invasion of a Host Cell as a Mechanism of Adaptation: a *Mycoplasma gallisepticum* Model**

Daria Matyushkina, Olga Pobeguts, Ivan Butenko, Anna Vanyushkina, Nicolay Anikanov, Olga Bukato, Daria Evsyutina, Alexandra Bogomazova, Maria Lagarkova, Tatiana Semashko, Irina Garanina, Vladislav Babenko, Maria Vakhitova, Valentina Ladygina, Gleb Fisunov, Vadim Govorun  
d.matyushkina@gmail.com

### **Supplementary Methods**

#### **Gentamicin invasion assay**

Cell lines were infected with the bacterium *Mycoplasma gallisepticum* S6 in a ratio of 1:1,000 respectively and cultured for 24 hours in a CO<sub>2</sub>-incubator. For the model of chronic infection HD3 cells were cultured with mycoplasma for 19 days and 7 weeks. Since mES and HeLa cell lines are adhesive, after 24h incubation of mES and HeLa with *M. gallisepticum* cells were washed from unbound mycoplasma 3 times with PBS buffer. Thereafter, extracellular bacteria were killed by incubation in medium containing 600 µg / ml of gentamicin and incubated for 3 hours at 37 °C, 5% CO<sub>2</sub>. A higher concentration of 600 µg / ml was used to ensure the reliability of the assay and was experimentally determined to be sufficient to kill 100% of *M. gallisepticum* in 3 h duration. After gentamicin treatment, the cells were washed two times with PBS. The final pellet was resuspended in preheated medium for *M. gallisepticum* and plated on semi-solid medium containing 0.3% bacteriological agar (Sigma-Aldrich). Cell suspension with cultural media for *M. gallisepticum* was used as a negative control. Invasion frequency was calculated as percentage ratio of CFU of intracellular mycoplasmas to CFU of mycoplasmas added initially. Then colonies of *M. gallisepticum* were subcultured in liquid medium and cultured

until the logarithmic growth phase. The cell pellet was obtained by centrifugation at 8,000g at 4 °C, 10 min.

### **Fluorescent labeling of eukaryotic cells with *M. gallisepticum* and confocal microscopy**

Eukaryotic cells were washed and infected with *M. gallisepticum* cultures by using a procedure described above for the gentamicin invasion assay. The infected cells were gently washed two times with PBS, fixed in 4% paraformaldehyde for 15 minutes at room temperature and rinsed two times with PBS. Fixed cells were permeabilized with a solution of 0.1% Triton X-100 in PBS for 3 min and washed two times with PBS. 5 µl methanolic stock solution of Alexa Fluor 568 phalloidin (Invitrogen) were diluted in 200 µl solution of 1% BSA in PBS. F-actin in eukaryotic cells was stained with phalloidin solution for 20 minutes at room temperature and washed two times with PBS. Nuclei of eukaryotic cells and mycoplasma were stained with DAPI solution (Invitrogen) (0.5 µg/ml in PBS) for 3 minutes at room temperature and rinsed two times with PBS, air-dried and mounted with a 24 × 50 mm coverslip and Bio Mount (Bio-Optica, Italy).

Samples were examined with LSM 510 Meta confocal laser scanning microscope (Carl Zeiss MicroImaging GmbH, Jena, Germany) using x63 oil objective (NA 1.40). Diode (405 nm) and helium-neon (543 nm) lasers were used for specific excitation of the fluorescent dyes DAPI and Alexa Fluor 568, respectively. The Z-stacks of fluorescent images were collected at 0.37-0.38 µm interval.

## **MRM LC-MS/MS analysis**

To obtain transition list for proteins of interest, peak lists with protein identification (.group files) obtained for IDA experiments were loaded into Skyline software, where no more than 10 unique peptides per protein with global FDR rate from fit according to PSPEP were selected with additional constraints on peptide length (7-20 amino acid residues), cleavage (fully tryptic peptides without missed cleavage sites or potential ragged ends) and modifications (only carbamidomethylation of cysteins allowed). For each precursor of charge 2, 3 or 4, 3 or 4 most intense fragment ions were selected. Raw data was obtained by duplicate injection of each sample with the same chromatographic setup with total cycle time of 3.3 s. After each sample correction for retention time drift was applied, scheduled MRM time window for each precursor comprised 5 minutes.

Processing of data included peak selection (with manual review), peak integration and export utilizing Skyline software. Further analysis was performed by homemade script in R. The algorithm included scaling normalization of LC-MS replicates on peptide level and of each set of samples on protein level (based on 2 most intense peptides). Proteins with mean change across 3 biological replicates was above the threshold of 1.2 were reported as significant.

## **SpxA overexpression in *M. gallisepticum***

The transformation of *M. gallisepticum* was performed by electroporation as described previously<sup>1</sup>. Transformants were selected on a semiliquid medium supplied with 2 µg/ml of tetracyclin. The transposon insertions were confirmed and mapped by PCR and

Sanger sequencing from the chromosome. The overexpression of the *spxA* gene was confirmed by real-time PCR.

### **Determination of hydrogen peroxide production**

The hydrogen peroxide production in *M. gallisepticum* during intracellular localization was determined using the Amplex® Red Hydrogen Peroxide / Peroxidase Assay Kit (Thermo Fisher Scientific Inc, USA). 50µl of the standard curve samples, controls and suspension of eukaryotic cells and *M. gallisepticum* were pipeted into individual wells of a microplate. The standard curve samples were made in the mix of media for eukaryotic cells and media for *M.gallisepticum*. HD3 cells incubated with media for *M. gallisepticum* were used as a control samples. 50µl of the Amplex® Red reagent / HRP working solution was added to each microplate well and incubated for 1hour at room temperature in the dark. Fluorescence was measured with a fluorescence microplate reader (xMark Microplate Spectrophotometer, BioRad) using absorbance 560nm. Background fluorescence, determined for a no-H<sub>2</sub>O<sub>2</sub> control reaction, has been subtracted from each value. Experiments were done in three independent experiments in triplicate.

### **Measurement of ATP concentration in *M. gallisepticum* cells**

Cultures of *M. gallisepticum* control strain and MIEC were taken in late-log phase. Normalization to the cell number was performed using quantitative RT-PCR. To determine the extracellular ATP in the microcuvette were added 20 µl of sample and 100 µl ATP-reagent (Lyumtek, Russia). An ATP-bioluminescence integral signal was measured within 30 seconds (RLU/s) at luminometer LUM-1 (Lyumtek, Russia). The measurement was carried out in three independent experiments performed in duplicate. The  $7.5 \cdot 10^{-9}$  M ATP

control solution (Lyumtek, Russia) was prepared in mycoplasma culture medium. To determine the total ATP were taken 50 µl of the sample in microtube, added 450 µl of anhydrous dimethylsulfoxide and mixed thoroughly. After 1 min 20 µl of obtained extract were added to microcuvette and ATP levels were measured as described above. ATP concentration was calculated by the formula:

$$[\text{ATP}]_{\text{sample}} = 10 \cdot 7,5 \cdot 10^{-9} = 7,5 \cdot 10^{-8} (I_{\text{sample}}) / (I_{\text{control}}), \text{ mol/l}$$

Coefficient “10” is the dilution factor of the sample in the preparation of the extract.

Normalization to the cell number was performed using quantitative RT-PCR.

### **References:**

1. Mazin, P. V. *et al.* Transcriptome analysis reveals novel regulatory mechanisms in a genome-reduced bacterium. *Nucleic Acids Res.* **42**, 13254–13268 (2014).

## Supplementary figures

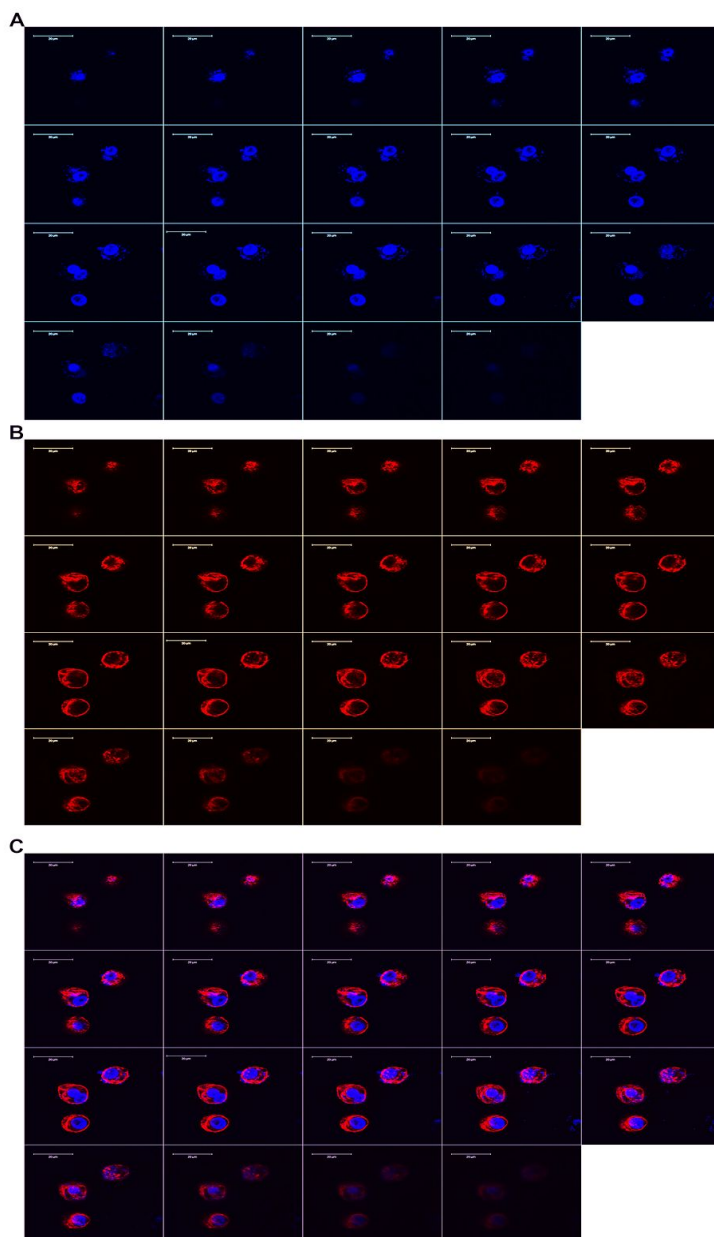

**S1 Figure. Composite confocal image of 19 Z sections of HD3 cells incubated with *M. gallisepticum* for 24 hours.**

0,37 - 0,38  $\mu\text{m}$  steps. DAPI fluorescence showing cell nuclei and mycoplasmas stained blue (A), Alexa Fluor 568 phalloidin fluorescence showing eukaryotic cell F-actin stained red (B). The merged fluorescent image is shown in (C). Scale bars, 20  $\mu\text{m}$ .

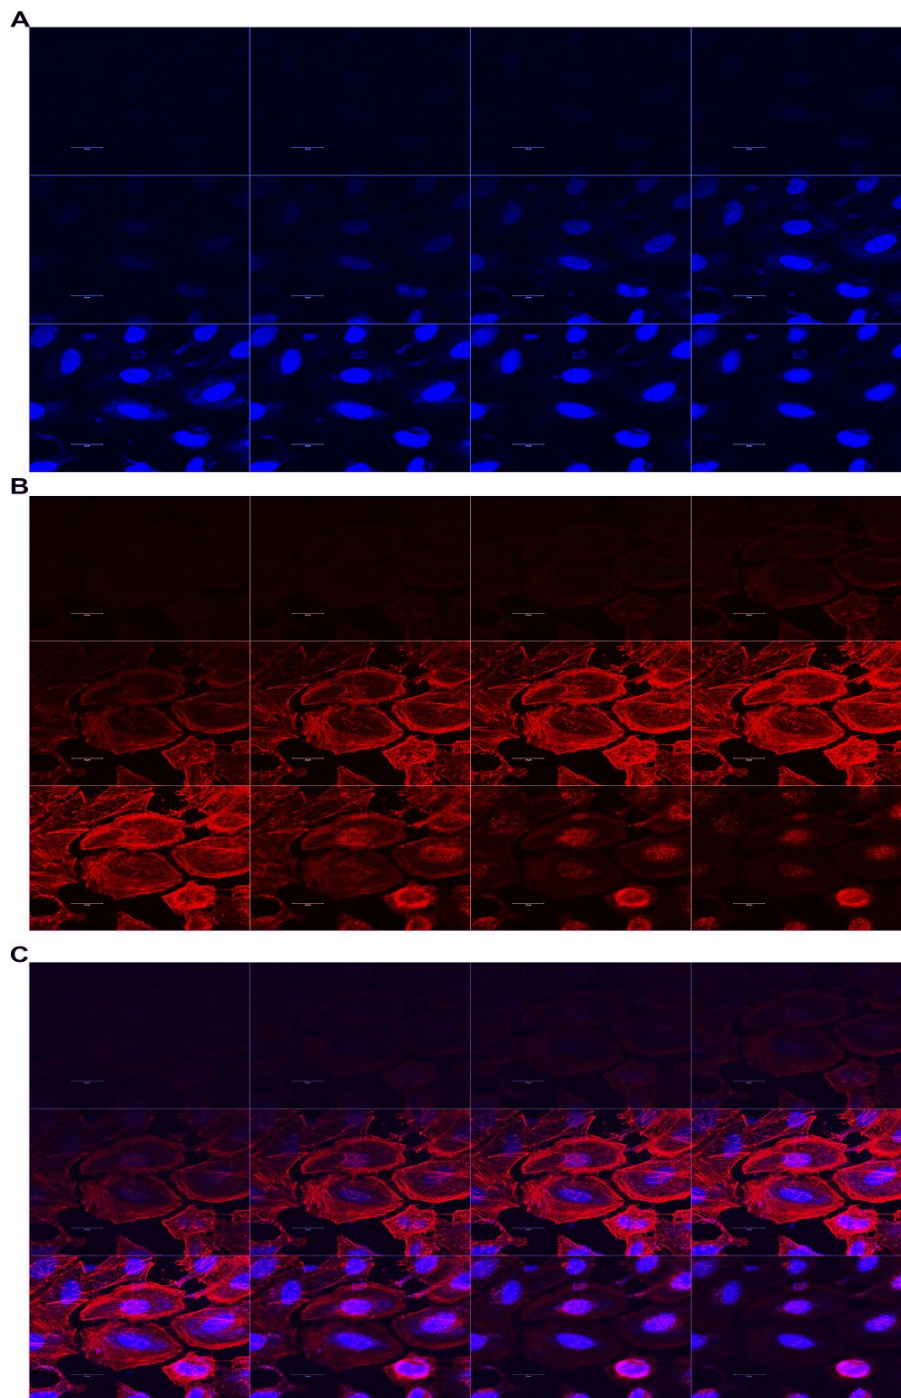

**S2 Figure. Composite confocal image of 12 Z sections of HeLa-229 cells incubated with *M. gallisepticum* for 24 hours.**

0,37 - 0,38  $\mu\text{m}$  steps. DAPI fluorescence showing cell nuclei and mycoplasmas stained blue (A), Alexa Fluor 568 phalloidin fluorescence showing eukaryotic cell F-actin stained red (B). The merged fluorescent image is shown in (C). Scale bars, 20  $\mu\text{m}$ .

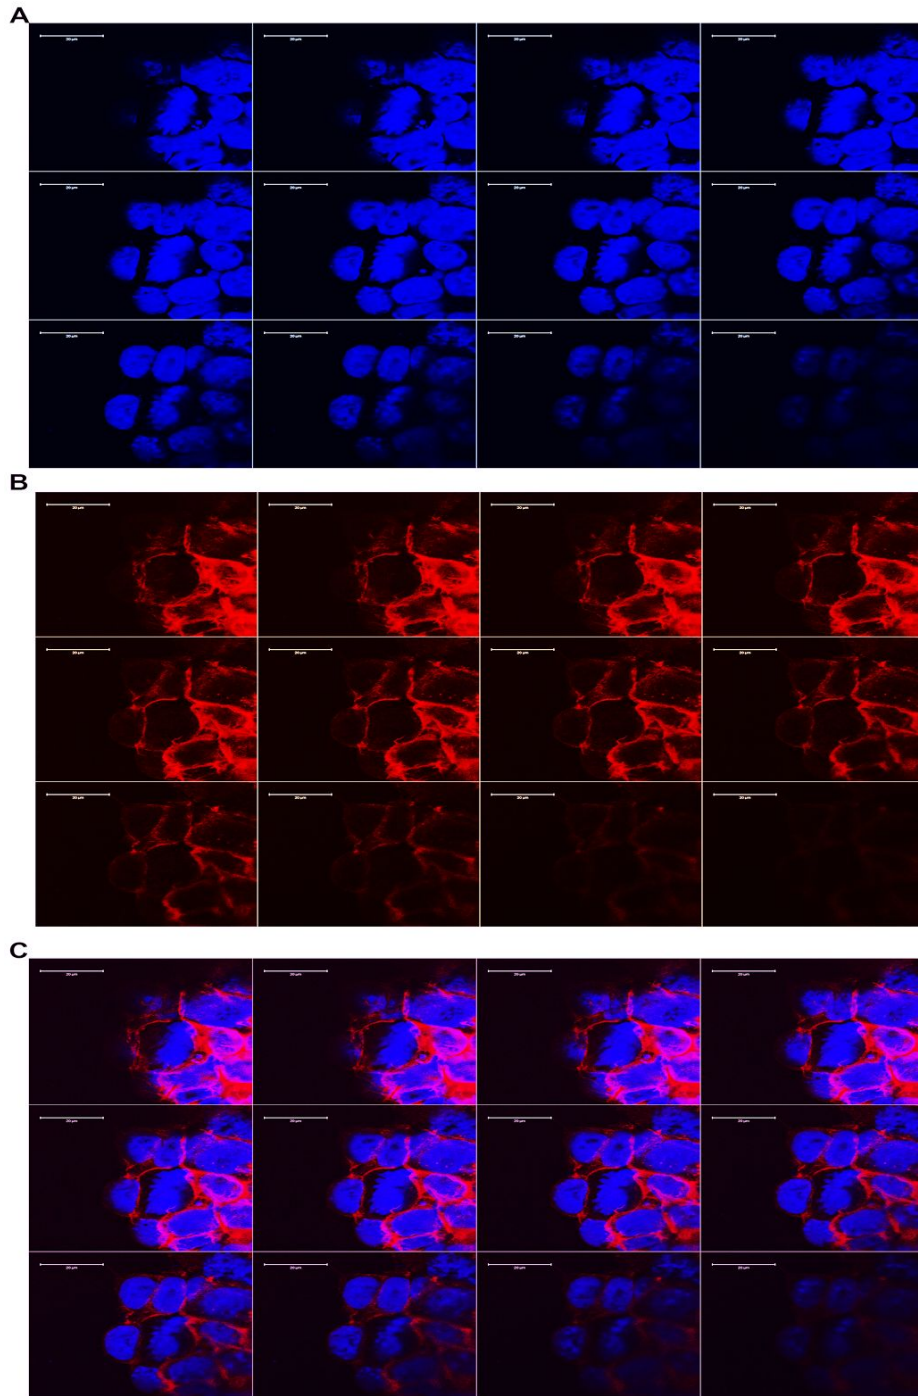

**S3 Figure. Composite confocal image of 12 Z sections of mES cells incubated with *M. gallisepticum* for 24 hours.**

0,37 - 0,38  $\mu\text{m}$  steps. DAPI fluorescence showing cell nuclei and mycoplasmas stained blue (A), Alexa Fluor 568 phalloidin fluorescence showing eukaryotic cell F-actin stained red (B). The merged fluorescent image is shown in (C). Scale bars, 20  $\mu\text{m}$ .



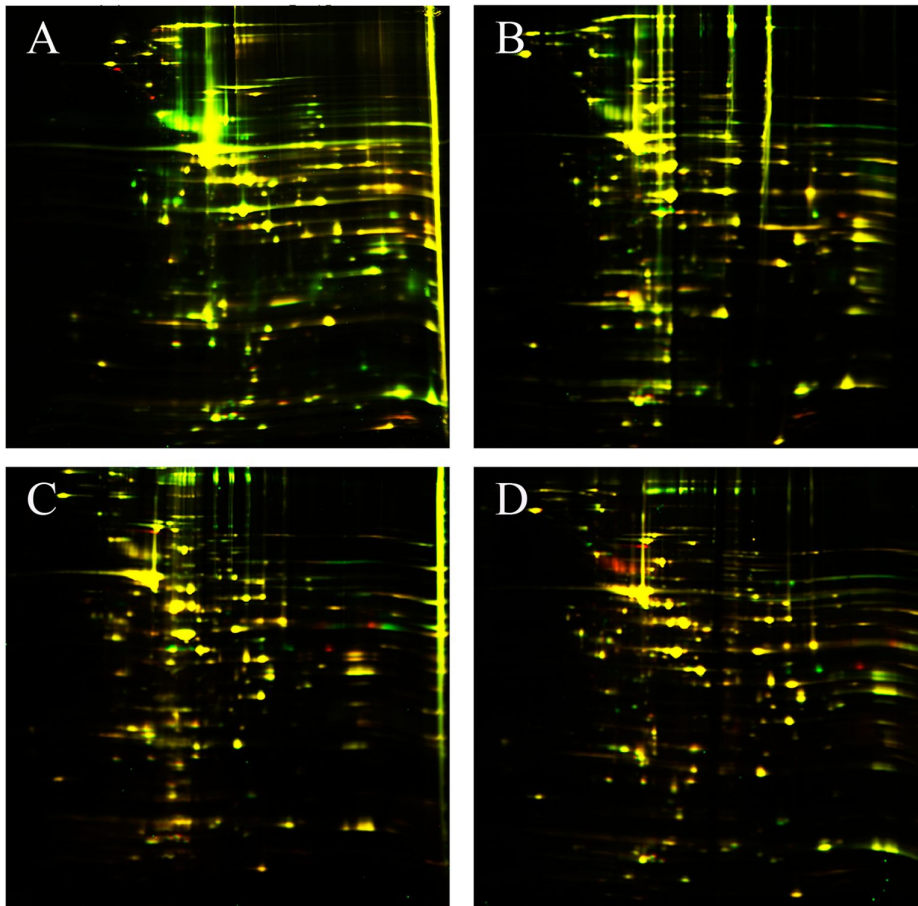

**S4 Figure. 2-D DIGE analysis of passages of *M. gallisepticum* isolated from HD3 cells after 24 h of infection.**

Intracellular *M. gallisepticum* stained Cy3 (red) and lab strain *M. gallisepticum* S6 stained Cy5 (green). X-axis - pI ranging from 3 to 10 from left to right, Y-axis – molecular weight from 12 kDa to 150 kDa from down to up. (A) second passage. (B) sixth passage. (C) twelfth passage. (D) sixteenth passage.

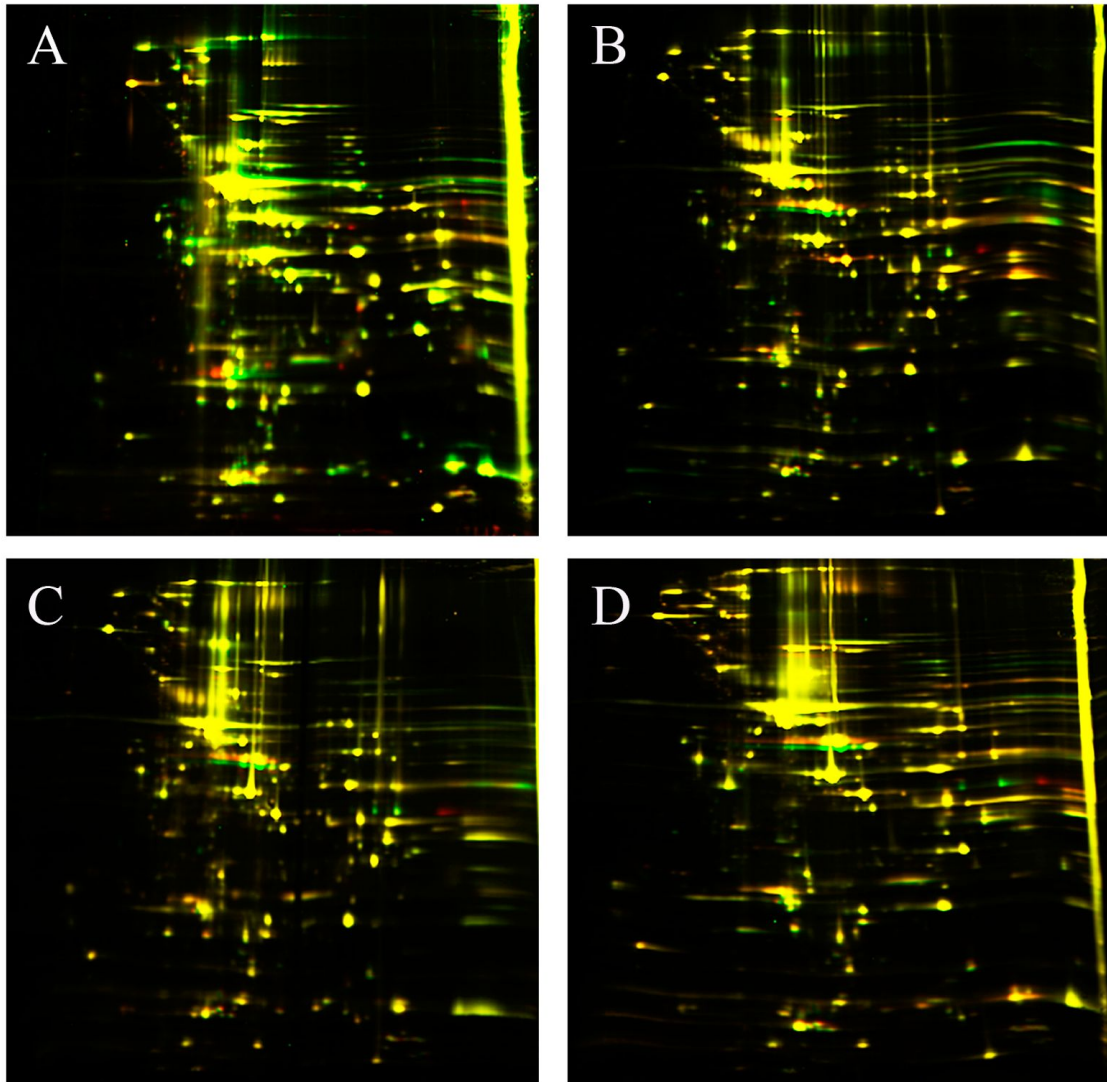

**S5 Figure. 2-D DIGE analysis of passages of *M. gallisepticum* isolated from HD3 cells after chronic infection (7 weeks).**

Intracellular *M. gallisepticum* stained Cy3 (red) and lab strain *M. gallisepticum* S6 stained Cy5 (green). X-axis - pI ranging from 3 to 10 from left to right, Y-axis – molecular weight from 12 kDa to 150 kDa from down to up. (A) second passage. (B) sixth passage. (C) twelfth passage. (D) sixteenth passage.

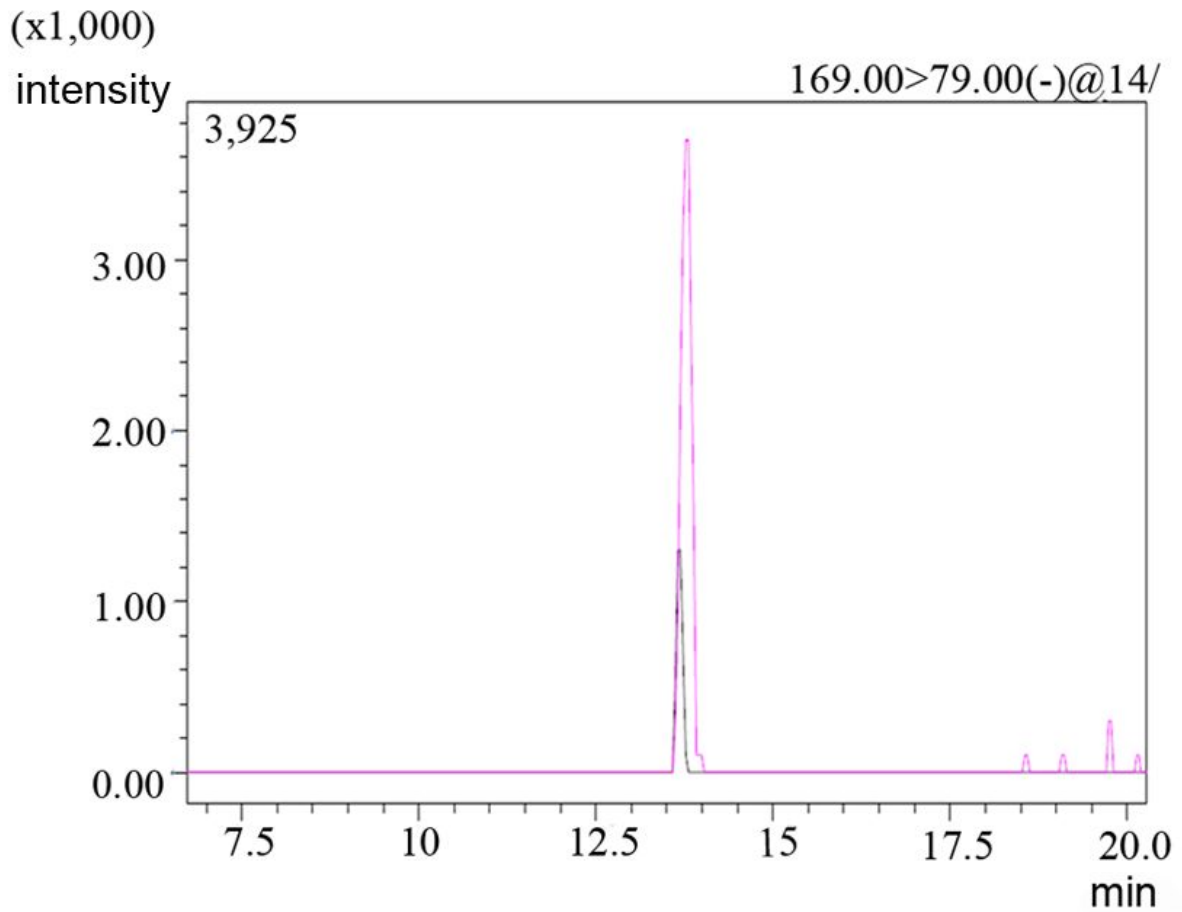

**S6 Figure. Comparative MRM chromatograms for DHAP/G-3-P transition in two mycoplasma samples.**

Overlay of MRM DHAP/G-3-P transitions for control laboratory *M. gallisepticum* (indicated in black) and *M. gallisepticum* isolated from mES cells after acute infection (indicated in pink) samples. Peak of DHAP/G-3-P was identified by transition 169.1/79.1 at the retention time 13.7 min.

## Supplementary tables

**Table S2. Changes in Vlh-hemagglutinins in *M. gallisepticum* isolated from three different cell lines after 24 h of infection compared to the control laboratory strain *M. gallisepticum* S6 according MRM-analysis.**

| Protein name | ORF Name  | Protein level (Fold-change)      |                                   |                                  |
|--------------|-----------|----------------------------------|-----------------------------------|----------------------------------|
|              |           | <i>M. gallisepticum</i> from HD3 | <i>M. gallisepticum</i> from HeLa | <i>M. gallisepticum</i> from mES |
| VlhA.3.07    | GCW_91181 | 2,3                              | 2,6                               | 2,0                              |
| VlhA.1.01    | GCW_01160 | 2,4                              | 2,4                               | 2,3                              |
| VlhA.5.02    | GCW_01920 | 2,7                              | 2,9                               | 2,4                              |
| VlhA.1.01    | GCW_01195 | 2,5                              | 2,3                               | 2,5                              |
| VlhA         | GCW_02390 | 1,6                              | 1,4                               | 3,3                              |
| VlhA.3.03    | GCW_01145 | 2,6                              | 3,1                               | 3,6                              |
| VlhA.1.01    | GCW_01940 | 4,1                              | 3,6                               | 3,9                              |
| VlhA.2.02    | GCW_02615 | 0,7                              | 0,8                               | 0,5                              |
| VlhA.3.08    | GCW_01170 | 0,8                              | 0,8                               | 0,8                              |
| VlhA.1.01    | GCW_01930 | 0,7                              | 0,7                               | 0,8                              |
| VlhA.3.03    | GCW_03350 | 1,4                              | 1,2                               | 0,7                              |
| VlhA         | GCW_92454 | 0,8                              | 0,7                               | 9,6                              |
| VlhA.1.01    | GCW_01155 | No change                        | No change                         | 0,4                              |
| VlhA.1.05    | GCW_02430 | No change                        | No change                         | 0,6                              |
| VlhA.2.01    | GCW_02605 | No change                        | No change                         | 0,6                              |
| VlhA         | GCW_92453 | No change                        | No change                         | 1,3                              |

|           |           |           |           |     |
|-----------|-----------|-----------|-----------|-----|
| VlhA.3.06 | GCW_03370 | No change | 0,8       | 1,4 |
| VlhA      | GCW_03335 | No change | 1,2       | 2,5 |
| VlhA.1.02 | GCW_02405 | 0,8       | No change | 0,2 |
| VlhA.1.01 | GCW_01175 | 1,2       | No change | 0,4 |
| VlhA      | GCW_92396 | 0,8       | No change | 0,6 |

The data represent the mean ( $\pm$ SD) of three independent experiments.

**Table S3. Changes in Vlh-hemagglutinin in *M. gallisepticum* isolated from three different cell lines after chronic infection in HD3 cells compared to control laboratory strain *M. gallisepticum* S6 according MRM-analysis.**

| Protein name | ORF Name  | Protein level (Fold-change) <sup>a</sup> |                                  |                                   |                                  |
|--------------|-----------|------------------------------------------|----------------------------------|-----------------------------------|----------------------------------|
|              |           | <i>M. gallisepticum</i>                  | <i>M. gallisepticum</i> from HD3 | <i>M. gallisepticum</i> from HeLa | <i>M. gallisepticum</i> from mES |
| VlhA.1.01    | GCW_01195 | 1,9                                      | 1,2                              | 1,9                               | 1,5                              |
| VlhA.3.03    | GCW_03350 | 0,4                                      | 0,6                              | 0,5                               | 0,5                              |
| VlhA         | GCW_03335 | 50,7                                     | No change                        | No change                         | No change                        |
| VlhA.1.01    | GCW_01160 | 14,1                                     | No change                        | No change                         | No change                        |
| VlhA.1.01    | GCW_01155 | No change                                | 0,3                              | 0,3                               | 0,4                              |
| VlhA.1.01    | GCW_02440 | No change                                | 0,5                              | 0,3                               | 0,4                              |
| VlhA.3.08    | GCW_01170 | No change                                | No change                        | 0,6                               | No change                        |
| VlhA.1.01    | GCW_02390 | No change                                | 0,1                              | No change                         | No change                        |
| VlhA         | GCW_93361 | No change                                | 0,3                              | No change                         | No change                        |
| VlhA.3.06    | GCW_03370 | No change                                | No change                        | No change                         | 0,5                              |
| VlhA         | GCW_91176 | No change                                | No change                        | No change                         | 0,5                              |
| VlhA         | GCW_92454 | No change                                | No change                        | No change                         | 0,6                              |

|           |           |           |           |           |           |
|-----------|-----------|-----------|-----------|-----------|-----------|
| VlhA.1.01 | GCW_01175 | No change | No change | No change | 1,6       |
| VlhA.3.03 | GCW_01145 | 0,5       | No change | No change | 0,6       |
| VlhA      | GCW_92456 | 2,1       | No change | No change | 0,5       |
| VlhA      | GCW_93371 | 0,6       | No change | 0,6       | No change |

<sup>a</sup> combined data for 19-day and 7-week chronic infections. The data represent the mean ( $\pm$ SD) of three independent experiments.

**Table S4. Comparative genomic analysis of *M. gallisepticum* isolated from HD3 cells after acute (24h) and chronic (7 weeks) infections with laboratory strain of *M. gallisepticum* S6.**

| ORF Name                                | Gene name           | Type of infection | Position | Ref | MIEC | Type of SNP |
|-----------------------------------------|---------------------|-------------------|----------|-----|------|-------------|
| upstream of GCW_01165 in VlhA cluster 1 |                     | acute, chronic    | 152250   | A   | T,G  |             |
| GCW_01960                               | VlhA.1.01 cluster 2 | chronic           | 465075   | A   | G    | nonsyn      |
|                                         |                     |                   | 465121   | C   | A,G  | nonsyn      |
|                                         |                     |                   | 465125   | T   | A    | syn         |
|                                         |                     |                   | 465131   | A   | T,G  | nonsyn      |
|                                         |                     |                   | 465137   | G   | A    | syn         |
|                                         |                     |                   | 465154   | C   | G    | nonsyn      |
|                                         |                     |                   | 465159   | G   | C    | nonsyn      |
|                                         |                     |                   | 465166   | T   | C    | syn         |
|                                         |                     |                   | 465216   | T   | A    | nonsyn      |
| upstream of GCW_02455 in VlhA cluster 3 |                     | chronic           | 588982   | G   | A    |             |

|                                               |                |                   |        |        |     |        |
|-----------------------------------------------|----------------|-------------------|--------|--------|-----|--------|
| upstream of<br>GCW_03335 in<br>VlhA cluster 4 |                | acute,<br>chronic | 801100 | T      | C   |        |
| GCW_03335                                     | VlhA cluster 4 | acute             | 800656 | T      | C,A | nonsyn |
| GCW_93371                                     |                | acute,<br>chronic | 816612 | G      | T   | nonsyn |
|                                               |                |                   | 816905 | A      | T   | syn    |
|                                               |                |                   | 817733 | A      | G   | syn    |
|                                               |                |                   | 818171 | C      | A,G | nonsyn |
|                                               |                | acute             | 817621 | G      | T,A | nonsyn |
|                                               |                | chronic           | 818179 | C      | T,G | nonsyn |
|                                               |                |                   | 818184 | T      | G   | nonsyn |
|                                               |                |                   | 818186 | T      | A   | nonsyn |
|                                               |                |                   | 818187 | G      | T   | syn    |
|                                               |                |                   | 818188 | G      | T   | nonsyn |
|                                               |                |                   | 818193 | G      | C   | syn    |
|                                               |                |                   | 818194 | G      | C   | nonsyn |
|                                               |                |                   | 818202 | T      | A   | nonsyn |
|                                               |                |                   | 818225 | T      | G   | nonsyn |
|                                               |                |                   | 818226 | G      | T,A | nonsyn |
| 818228                                        | A              |                   | G      | nonsyn |     |        |
| 818255                                        | T              | C,A               | nonsyn |        |     |        |
| upstream of<br>GCW_93372 in<br>VlhA cluster 4 |                | acute             | 818493 | T      | G   |        |
| upstream<br>mobile element<br>protein         |                | acute             | 348358 | A      | T   |        |

|                                             |                                                             |         |        |   |     |        |
|---------------------------------------------|-------------------------------------------------------------|---------|--------|---|-----|--------|
| (GCW_91455)                                 |                                                             |         |        |   |     |        |
| upstream mobile element protein (GCW_90633) |                                                             | chronic | 152250 | A | T,G |        |
| GCW_00395                                   | 23S ribosomal RNA                                           | chronic | 318386 | G | A   |        |
| GCW_01395                                   | asparaginyl-tRNA synthetase                                 | chronic | 332883 | G | T   | syn    |
| GCW_01520                                   | M42 glutamyl-aminopeptidase family protein                  | chronic | 359323 | T | C   | syn    |
| GCW_01520                                   | M42 glutamyl-aminopeptidase family protein                  | chronic | 359324 | A | C   | nonsyn |
| GCW_92037                                   | Phenylalanyl-tRNA synthetase (PheRS) beta chain core domain | chronic | 483621 | A | G,T | nonsyn |
| GCW_03035                                   | 30S ribosomal protein S12                                   | chronic | 723019 | T | C   | syn    |
| GCW_03045                                   | hypothetical protein DUF3682, eukaryotic protein            | chronic | 724257 | G | C   | nonsyn |

**MIEC** - mycoplasma isolated from eukaryotic cells; **Ref** - references strain of *M. gallisepticum* S6; **syn** – synonymous; **nonsyn** – nonsynonymous.



**S5 Table. Identified metabolites of *M. gallisepticum* isolated from mES after acute infection compared control laboratory *M. gallisepticum* S6 strain.**

| Compound name            | Compound ID   | I1        | I2      | Fold I1/I2 |
|--------------------------|---------------|-----------|---------|------------|
| <i>negativ mode</i>      |               |           |         |            |
| Phosphoenolpyruvate      | C00074        | 38165     | nd      | up         |
| NAD+                     | C00003        | 63736,4   | 53433   | 1,2        |
| Glycerol-P               | C00093        | 5343,1    | nd      | up         |
| Threonine                | C00188        | 5343,1    | 6511    | 0,8        |
| arginine                 | C00062        | 25394,6   | 31834   | 0,8        |
| 6-Phospho-D-gluconate    | C00345        | 20536     | 27334   | 0,8        |
| CMP                      | C00055        | 3134,8    | 3592    | 0,9        |
| dGMP                     | C00362        | 9769,9    | 2467    | 4,0        |
| Phosphoenolpyruvate      | C00074        | 38165     | 5613    | 6,8        |
| Dihydroxy-aceton-P/G-3-P | C00111        | 70606,1   | 8756    | 8,1        |
| Erythrose-4-P-13C4       | C00279        | nd        | 4482    | down       |
| <i>positiv mode</i>      |               |           |         |            |
| Adenosine                | C00559        | 5230114,6 | 2016040 | 2,6        |
| Xanthosine               | C01762        | 1499131,4 | 417210  | 3,6        |
| Guanosine                | C00387        | 4476678   | 1250565 | 3,6        |
| Cytidine                 | C00475        | 614414    | 343213  | 1,8        |
| Tryptophan               | C00078        | 185493,8  | 105235  | 1,8        |
| FAD                      | C00016        | 18104,45  | 119922  | 0,2        |
| Adenine                  | C00147        | 415332,1  | 197462  | 2,1        |
| Guanine                  | C00242        | 1267841,3 | 1816768 | 0,7        |
| Lysine                   | C00047        | 3932105,1 | 2999007 | 1,3        |
| NAD                      | C00003        | 3867,5    | 67579   | 0,1        |
| UMP                      | C00105        | nd        | 3640    | down       |
| AMP                      | C00020        | nd        | 47661   | down       |
| Leucine                  | C00123/C00407 | 942927,1  | 485683  | 1,9        |
| Valine                   | C00183        | 1250108,6 | 670212  | 1,9        |

|                       |        |            |          |      |
|-----------------------|--------|------------|----------|------|
| <b>Phenilalanine</b>  | C00079 | 1349011,2  | 1043367  | 1,3  |
| <b>Proline</b>        | C00148 | 197968,4   | 3842416  | 0,1  |
| <b>Arginine</b>       | C00062 | 30710530,6 | 22406675 | 1,4  |
| <b>Citrulline</b>     | C00327 | 18786,7    | 78267    | 0,2  |
| <b>Alanine</b>        | C00041 | 24945,8    | 122195   | 0,2  |
| <b>Threonine</b>      | C00188 | nd         | 24209    | down |
| <b>Methionine</b>     | C00073 | 400769,9   | 229827   | 1,7  |
| <b>NADH</b>           | C00004 | nd         | 10920    | down |
| <b>Nicotinamide</b>   | C00153 | 65589,4    | 88773    | 0,7  |
| <b>Glutamine-13C2</b> | C00064 | 679818,1   | 1044764  | 0,7  |
| <b>AMP</b>            | C00020 | nd         | 19793    | down |

**nd**, not detectable; **I1 (test)**, the value of the average normalized integrated intensity of the peak in the group of test samples (*M. gallisepticum* isolated from mES after acute infection); **I2(control)**, the value of the average normalized integrated intensity of the peak in the group of control samples (control laboratory *M. gallisepticum* S6 strain); **Fold I1/I2**, the ratio of the average integrated intensities. The data represent the mean ( $\pm$ SD) of three independent experiments.

**S6 Table. Parameters of MSMS identification of metabolites.**

| <b>Compound name</b>      | <b>ion transition</b> | <b>RT,min</b> | <b>Event number</b> |
|---------------------------|-----------------------|---------------|---------------------|
| Fumarate                  | 115.00>71.00          | 1,5           | 3:MRM(-)            |
| Orotate                   | 155.00>111.00         | 11,05         | 10:MRM(-)           |
| Dyhydrooorotate           | 157.00>113.00         | 11,5          | 11:MRM(-)           |
| Mannitol                  | 181.05>71.00          | 11,44         | 2:MRM(-)            |
| Mannitol2                 | 181.05>59.00          | 11,44         | 2:MRM(-)            |
| Erythrose-4-P-1           | 199.00>97.00          | 14,1          | 21:MRM(-)           |
| Phenylpyruvate            | 163.00>91.00          | 11,654        | 12:MRM(-)           |
| Trehalose                 | 341.00>179.00         | 12,279        | 35:MRM(-)           |
| UDP-N-acetyl-glucoseamine | 606.00>385.00         | 12,657        | 31:MRM(-)           |
| Succinate                 | 117.00>73.00          | 12,8          | 4:MRM(-)            |

|                           |               |        |           |
|---------------------------|---------------|--------|-----------|
| Thymidine                 | 241.00>125.00 | 1,95   | 1:MRM(-)  |
| Malate                    | 133.00>115.00 | 13,6   | 7:MRM(-)  |
| a-ketoglutarate           | 145.00>101.00 | 12,5   | 9:MRM(-)  |
| Gluconate                 | 195.00>129.00 | 13,3   | 20:MRM(-) |
| Deoxyribose-P             | 213.00>79.00  | 13,9   | 22:MRM(-) |
| Ribose-5P1                | 229.00>138.90 | 13,9   | 22:MRM(-) |
| Ribose-5P2                | 229.00>96.90  | 13,9   | 22:MRM(-) |
| NAD <sup>+</sup>          | 662.00>540.00 | 13,506 | 1:MRM(-)  |
| Phosphoenolpyruvate       | 167.00>79.00  | 13,975 | 13:MRM(-) |
| Glycerol-P                | 171.00>79.00  | 13,778 | 15:MRM(-) |
| Glycerol-P                | 171.00>96.95  | 13,778 | 15:MRM(-) |
| Glycerol-P-13C3           | 174.00>79.00  | 13,778 | 15:MRM(-) |
| Glycerol-P-13C3           | 174.00>96.95  | 13,778 | 15:MRM(-) |
| PRPP                      | 389.00>291.00 | 14,5   | 37:MRM(-) |
| dTDP                      | 401.00>159.00 | 14,3   | 39:MRM(-) |
| ATP                       | 506.00>408.00 | 13,838 | 47:MRM(-) |
| D-hexose-6-P              | 259.00>79.00  | 13,892 | 24:MRM(-) |
| D-hexose-6-P              | 259.00>199.00 | 13,892 | 24:MRM(-) |
| Threonine                 | 118.00>74.00  | 13,7   | 5:MRM(-)  |
| ADP                       | 426.00>134.00 | 14,322 | 42:MRM(-) |
| dGDP                      | 426.00>159.00 | 13,9   | 43:MRM(-) |
| Oxidized glutathione      | 611.10>306.05 | 14     | 49:MRM(-) |
| 2-phosphoglycerate        | 185.00>97.00  | 13,9   | 18:MRM(-) |
| N-acetyl-glucoseamine-P 1 | 300.00>79.00  | 14,185 | 27:MRM(-) |
| NADP                      | 742.00>620.00 | 14,487 | 33:MRM(-) |

|                   |               |        |           |
|-------------------|---------------|--------|-----------|
| UDP               | 403.00>305.00 | 12,3   | 41:MRM(-) |
| Arginine          | 173.10>131.00 | 19,329 | 16:MRM(-) |
| Arginine 13C6     | 179.10>136.00 | 19,329 | 16:MRM(-) |
| Glutamate 12      | 146.05>128.05 | 13,6   | 16:MRM(-) |
| Glutamate 13c5    | 151.05>133.05 | 13,6   | 16:MRM(-) |
| Glucose 1         | 179.05>113.05 | 11,3   | 16:MRM(-) |
| Glucose 2         | 179.00>89.00  | 11,3   | 16:MRM(-) |
| Glucose 13c61     | 185.05>118.05 | 11,3   | 16:MRM(-) |
| Glucose 13c6 2    | 185.05>92.00  | 11,3   | 16:MRM(-) |
| Citrate           | 191.00>111.00 | 19,2   | 19:MRM(-) |
| Carbomail-P       | 140.00>79.00  | 25,01  | 8:MRM(-)  |
| Glycerate         | 105.00>75.00  | 12,6   | 51:MRM(-) |
| Pyruvate          | 87.00>43.00   | 9,8    | 51:MRM(-) |
| Pyruvate13C       | 90.00>45.00   | 9,8    | 51:MRM(-) |
| Tryptophane1      | 203.10>116.05 | 12,5   | 51:MRM(-) |
| Tryptophane2      | 203.10>142.05 | 12,5   | 51:MRM(-) |
| Oxaloacetate      | 131.00>87.00  | 13,2   | 6:MRM(-)  |
| Citrulline        | 174.00>131.00 | 14,1   | 17:MRM(-) |
| Uridine           | 243.00>200.00 | 2,5    | 23:MRM(-) |
| Glucosamine-P-(1) | 258.05>78.95  | 12,5   | 25:MRM(-) |
| Glucosamine-P-(2) | 258.05>96.95  | 12,5   | 25:MRM(-) |
| 6-P-D-gluconate   | 275.00>97.00  | 4,59   | 26:MRM(-) |
| UDP-D-glucose     | 565.00>323.00 | 12,6   | 28:MRM(-) |
| PPGPP             | 602.00>504.00 | 24,5   | 30:MRM(-) |
| NADH              | 664.00>408.00 | 15,4   | 32:MRM(-) |

|                 |               |      |           |
|-----------------|---------------|------|-----------|
| Fructose-1,6-PP | 339.00>97.00  | 13,8 | 36:MRM(-) |
| dCDP            | 386.00>159.00 | 10,3 | 38:MRM(-) |
| CDP             | 402.00>159.00 | 14   | 40:MRM(-) |
| IDP             | 427.00>159.00 | 14   | 44:MRM(-) |
| GDP             | 442.00>159.00 | 14   | 45:MRM(-) |
| FMN             | 455.00>213.00 | 10,2 | 46:MRM(-) |
| CMP             | 306.05>143.05 | 13,3 | 48:MRM(-) |
| Acetyl-CoA-2C13 | 810.10>408.00 | 13,6 | 50:MRM(-) |
| Acetyl-CoA1     | 808.10>408.00 | 13,6 | 50:MRM(-) |
| Acetyl-CoA2     | 808.10>461.05 | 13,6 | 50:MRM(-) |
| Acetyl-P        | 139.00>79.00  | 13,8 | 50:MRM(-) |
| Acetyl-P-2C13   | 141.00>79.00  | 13,8 | 50:MRM(-) |
| UTP             | 483.00>159.00 | 14   | 1:MRM(-)  |
| CTP             | 482.00>159.00 | 14,1 | 1:MRM(-)  |
| GTP             | 522.00>424.00 | 14,1 | 1:MRM(-)  |
| ITP             | 507.00>409.00 | 14,1 | 1:MRM(-)  |
| dATP            | 490.00>159.00 | 14,1 | 1:MRM(-)  |
| dADP            | 410.00>79.00  | 14,1 | 1:MRM(-)  |
| dCMP            | 306.10>110.00 | 14,1 | 1:MRM(-)  |
| dCTP            | 466.00>159.00 | 14,1 | 1:MRM(-)  |
| dGMP            | 346.00>78.90  | 13,8 | 1:MRM(-)  |
| dGTP            | 506.10>408.10 | 14,1 | 1:MRM(-)  |
| XTP             | 523.00>159.00 | 14,1 | 1:MRM(-)  |
| TTP             | 481.00>159.00 | 14,1 | 1:MRM(-)  |
| NADPH           | 744.00>408.00 | 14,4 | 34:MRM(-) |

|                                      |               |       |           |
|--------------------------------------|---------------|-------|-----------|
| Hexose-6-P 3                         | 259.00>169.00 | 13,8  | 24:MRM(-) |
| Hexose-6-P 1                         | 259.00>79.00  | 13,8  | 24:MRM(-) |
| Hexose-6-P-13C6 1                    | 265.00>79.00  | 13,8  | 24:MRM(-) |
| Hexose-6-P-13C6 2                    | 265.00>203.00 | 13,8  | 24:MRM(-) |
| Hexose-6-P-13C6 3                    | 265.00>172.00 | 13,8  | 24:MRM(-) |
| Dihydroxy-aceton-P/G-3-P1            | 169.00>79.00  | 13,6  | 14:MRM(-) |
| Dihydroxy-aceton-P/G-3-P2            | 169.00>96.95  | 13,6  | 14:MRM(-) |
| DHAP/G-3-P-13C3 1                    | 172.00>79.00  | 13,6  | 14:MRM(-) |
| DHAP/G-3-P-13C3 2                    | 172.00>96.95  | 13,6  | 14:MRM(-) |
| Glycerate-1,3-PP                     | 265.00>78.95  | 13,8  | 25:MRM(-) |
| Glycerate-1,3-PP-13C3                | 268.00>78.95  | 13,8  | 25:MRM(-) |
| Glycerate-3-P/Glycerate-2-P          | 185.00>97.00  | 13,8  | 18:MRM(-) |
| Glycerate-3-P/Glycerate-2-P-1<br>3C3 | 188.00>97.00  | 13,8  | 18:MRM(-) |
| Glycerate-3-P                        | 185.00>169.00 | 13,8  | 18:MRM(-) |
| Glycerate-3-P-13C3                   | 188.00>172.00 | 13,8  | 18:MRM(-) |
| Glycerate-2-P                        | 185.00>141.00 | 13,8  | 18:MRM(-) |
| Glycerate-2-P-13c3                   | 188.00>144.00 | 12,58 | 18:MRM(-) |
| PEP                                  | 167.00>79.00  | 13,7  | 13:MRM(-) |
| PEP 13C3                             | 170.00>79.00  | 13,7  | 13:MRM(-) |
| Lactate                              | 89.00>41.00   | 8,9   | 51:MRM(-) |
| Lactate-13C3                         | 92.00>43.00   | 8,9   | 51:MRM(-) |
| Ac-CoA-13c2 1                        | 810.10>408.00 | 13,5  | 50:MRM(-) |
| Ac-CoA-13c2 2                        | 810.00>463.05 | 13,5  | 50:MRM(-) |
| Ribose-5P-13C5 1                     | 234.00>141.00 | 13,9  | 22:MRM(-) |

|                      |               |       |           |
|----------------------|---------------|-------|-----------|
| Ribose-5P-13c5 2     | 234.00>96.90  | 13,9  | 22:MRM(-) |
| Erythrose-4-P 2      | 199.00>138.90 | 14,1  | 21:MRM(-) |
| Erythrose-4-P-13C4 1 | 203.00>97.00  | 14,1  | 21:MRM(-) |
| Erythrose-4-P-13c4 2 | 203.00>141.00 | 14,1  | 21:MRM(-) |
| Alanine              | 88.05>42.00   | 12    | 5:MRM(-)  |
| Alanine-13C3         | 91.00>91.10   | 12    | 5:MRM(-)  |
| Thymidine            | 241.00>125.00 | 2     | 1:MRM(-)  |
| Acetyl-Glucosamine 1 | 220.10>59.00  | 0,001 | 36:MRM(-) |
| Acetyl-Glucosamine 2 | 220.10>101.00 | 0,001 | 36:MRM(-) |
| Acetyl-Glucosamine 3 | 220.10>176.60 | 0,001 | 36:MRM(-) |
| Glutamin1            | 145.05>101.00 | 13,5  | 9:MRM(-)  |
| Glutamin2            | 145.05>127.10 | 13,5  | 9:MRM(-)  |
| Glutamin-13C5 2      | 150.05>132.10 | 13,5  | 9:MRM(-)  |
| Glutamin3            | 145.05>109.05 | 13,5  | 9:MRM(-)  |
| Glutamin-13C5 3      | 150.05>113.05 | 13,5  | 9:MRM(-)  |
| Glutamate1           | 146.05>128.05 | 13,5  | 9:MRM(-)  |
| Glutamate-13C51      | 151.05>133.05 | 13,5  | 9:MRM(-)  |
| Glutamate2           | 146.05>102.05 | 13,5  | 9:MRM(-)  |
| Glutamate-13C 2      | 151.05>106.05 | 13,3  | 9:MRM(-)  |
| Glutamin4            | 145.10>42.00  | 13,5  | 9:MRM(-)  |
